# Supplementary material for: Dissecting phenotypic transitions in metastatic disease via photoconversion-based isolation
Source: eLife journal article supplement (doi:10.7554/elife.63270), 2021-02-23
Supplement: supp [file elife-63270-supp-v1.zip]

Archive with 6 entries (6 files):
- elife_poa_e63270_Transparent_Reporting_File.pdf
- elife_poa_e63270_Figure_1_figure_supplement_1.pdf
- elife_poa_e63270_Figure_1_figure_supplement_2.pdf
- elife_poa_e63270_Figure_1_figure_supplement_3.pdf
- elife_poa_e63270_Figure_2_figure_supplement_1.pdf
- elife_poa_e63270_Figure_4_figure_supplement_1.pdf
