# Supplementary figures and images for: Dissecting phenotypic transitions in metastatic disease via photoconversion-based isolation
Source: eLife journal article supplement (doi:10.7554/elife.63270), 2021-02-23

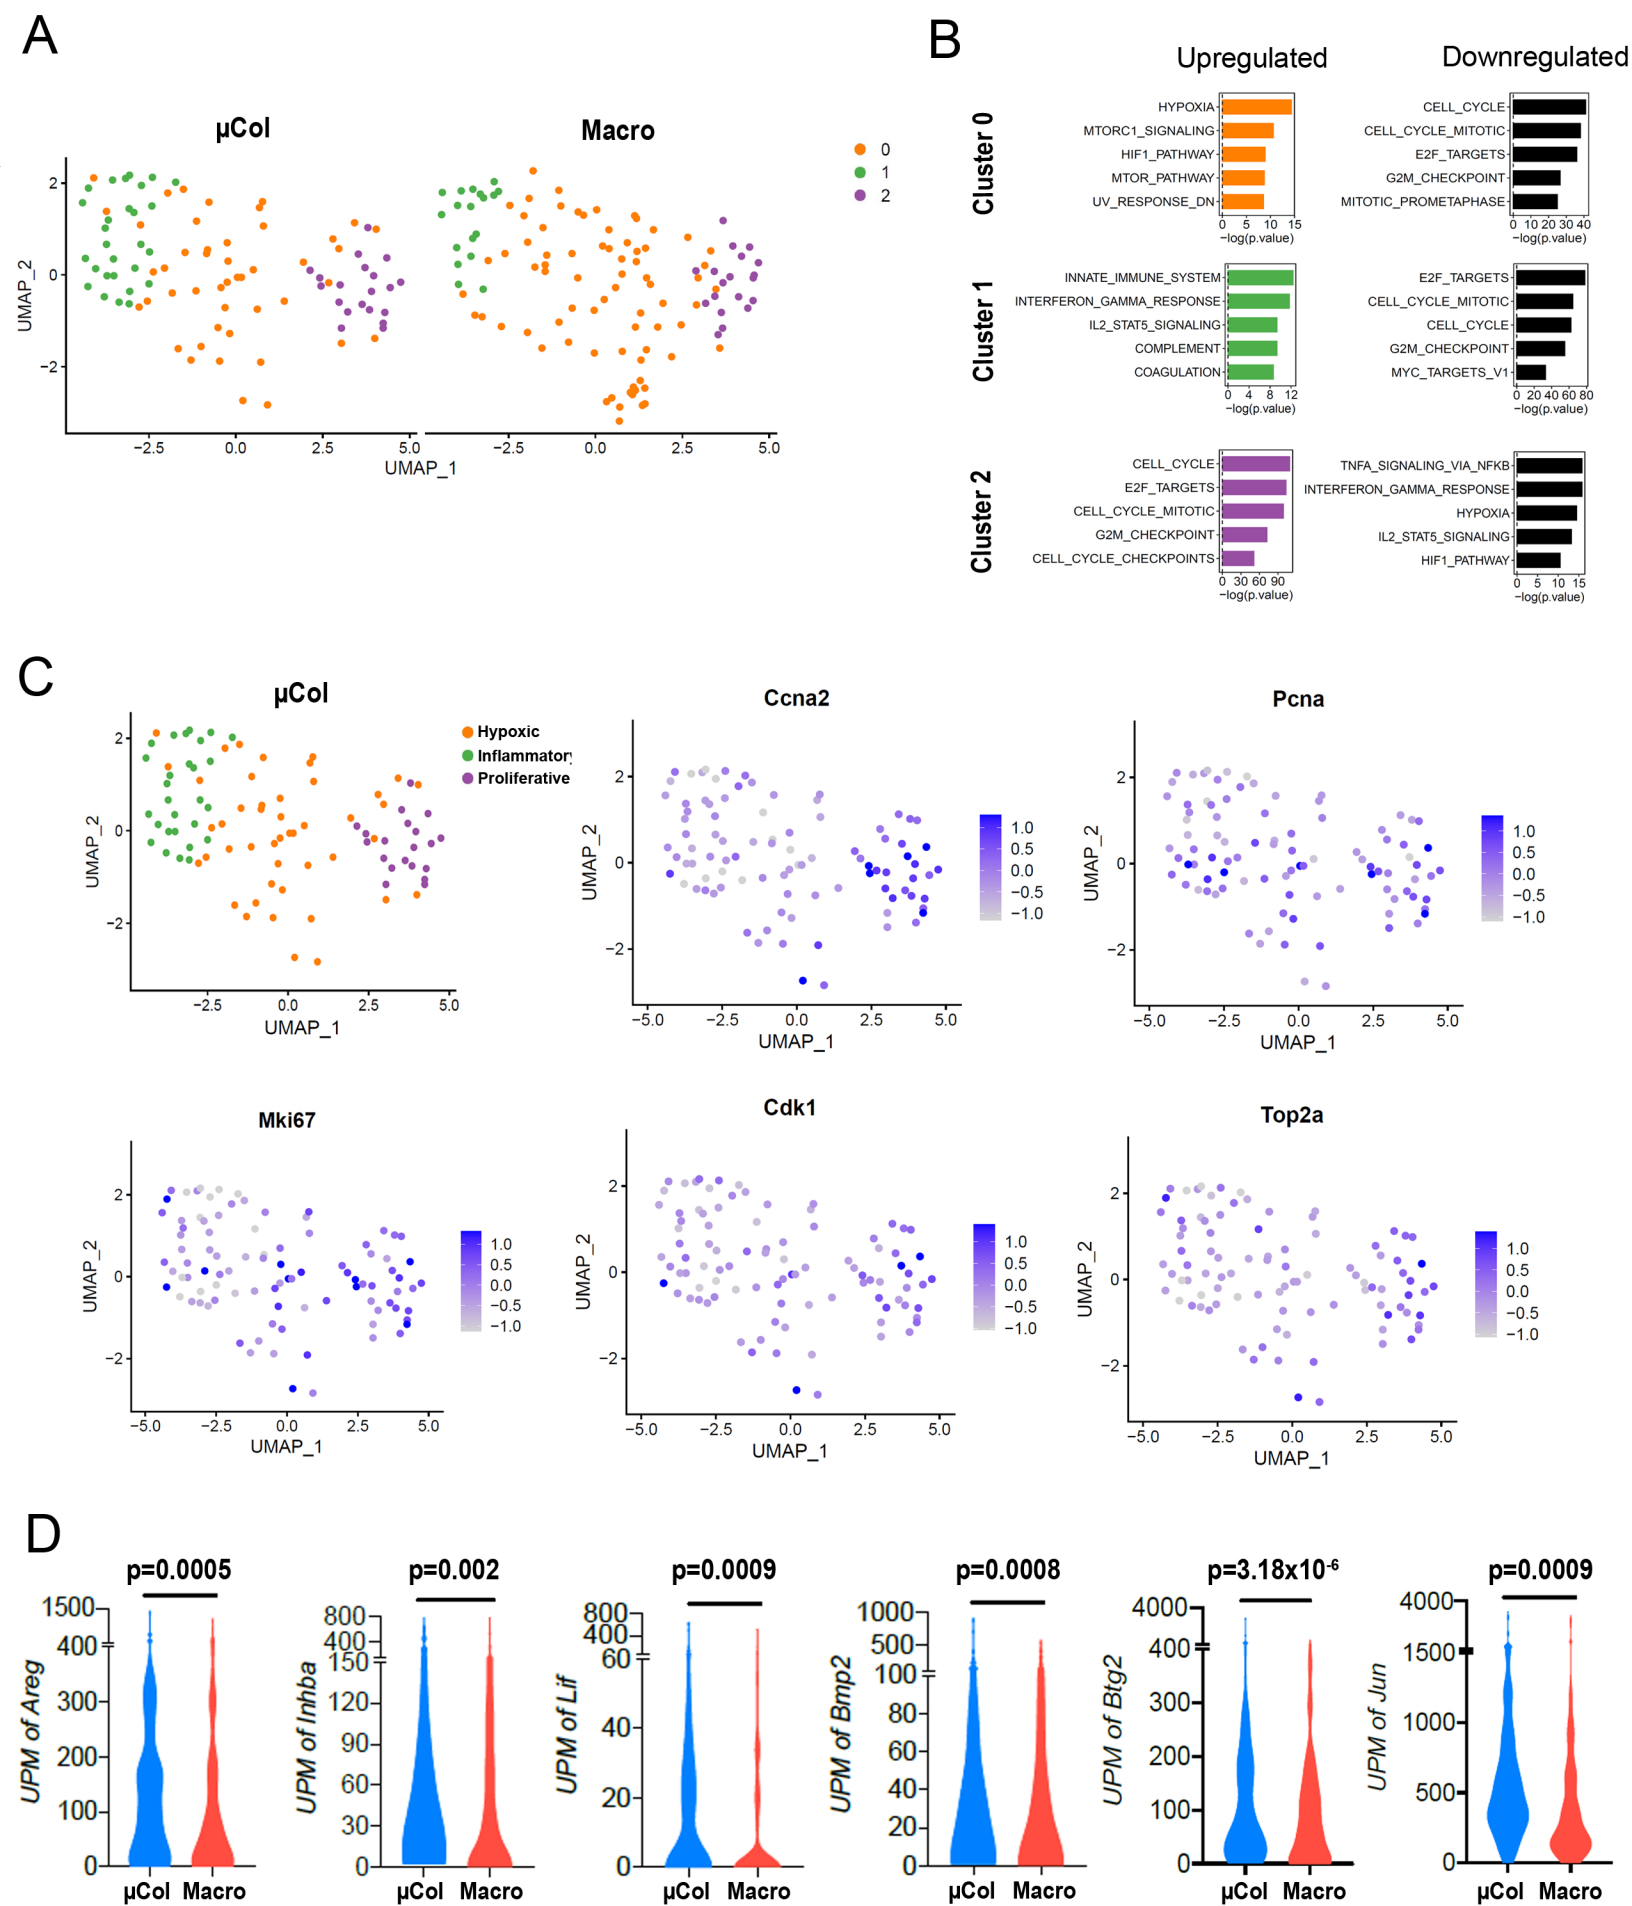

Figure2-figure supplement 1

Supplement: supp [file elife-63270-supp-v1.zip]

A

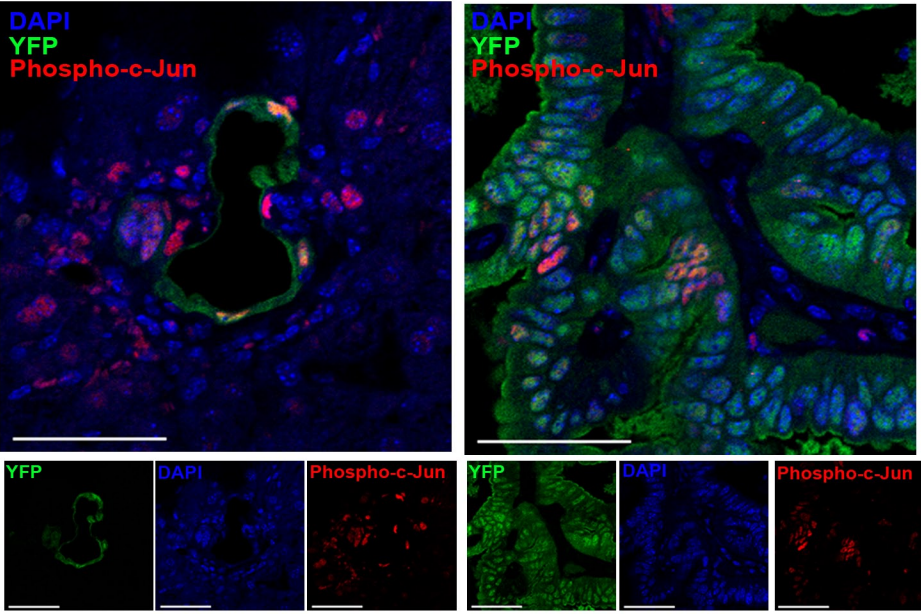

B

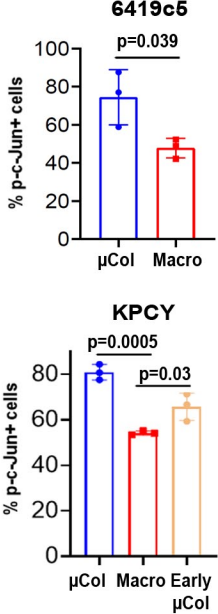

C

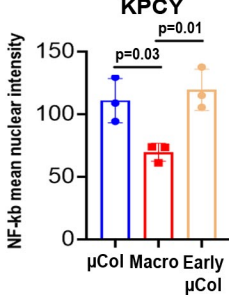

Figure 4-figure supplement 1

Supplement: supp [file elife-63270-supp-v1.zip]

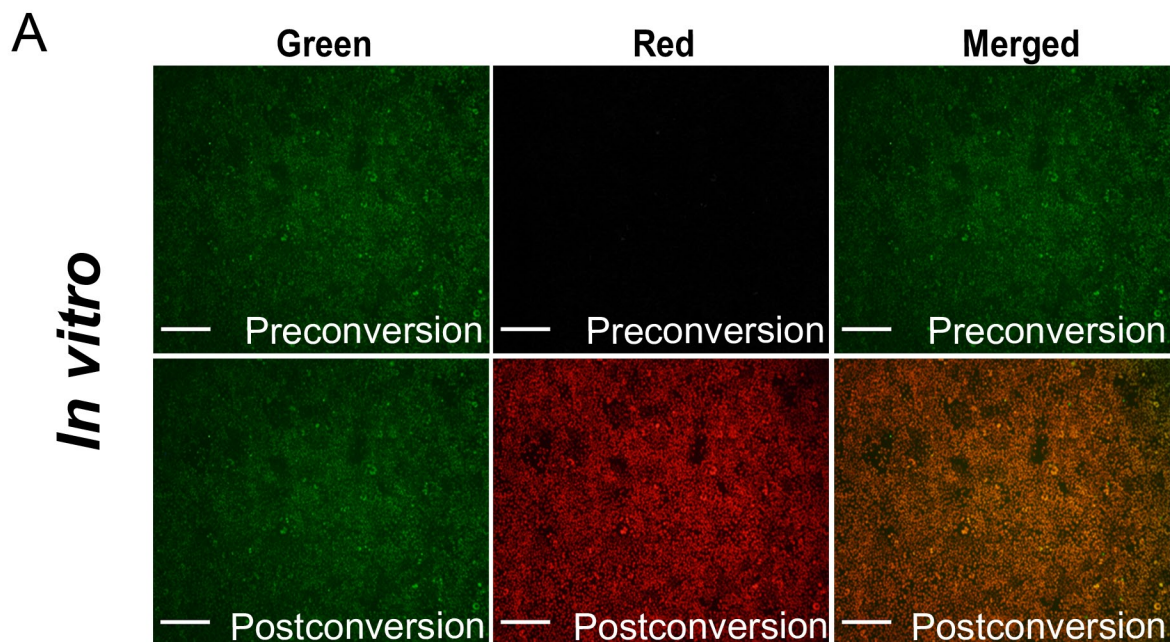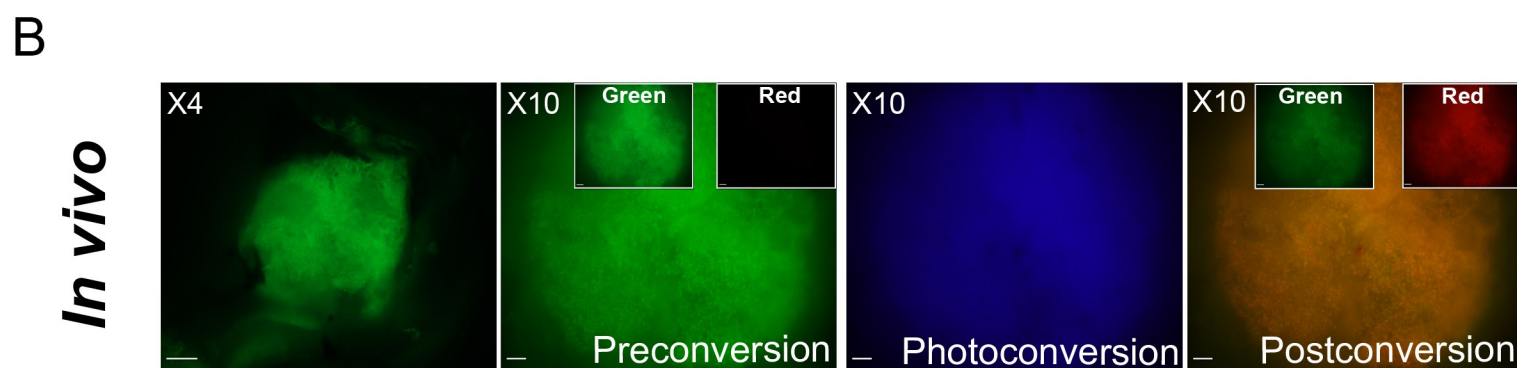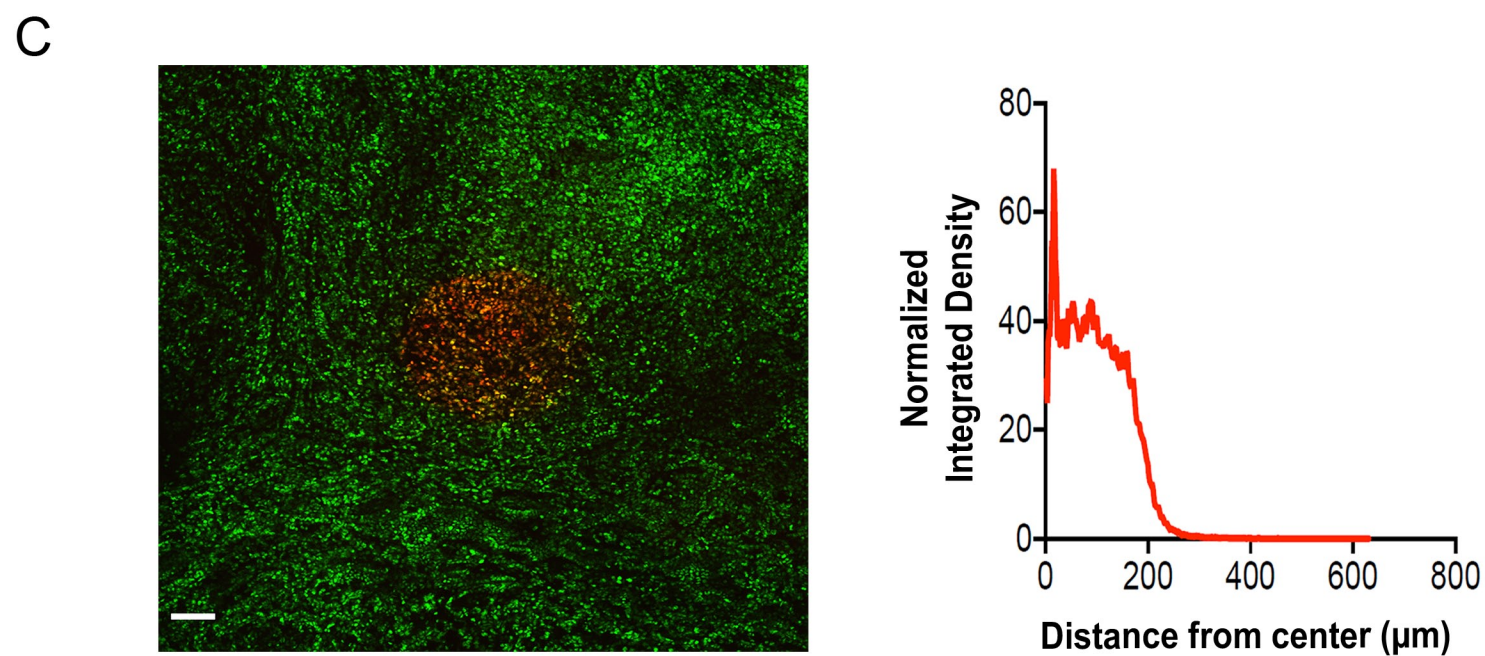

Figure1-figure supplement 1

Supplement: supp [file elife-63270-supp-v1.zip › elife_poa_e63270_Figure_1_figure_supplement_1.pdf]

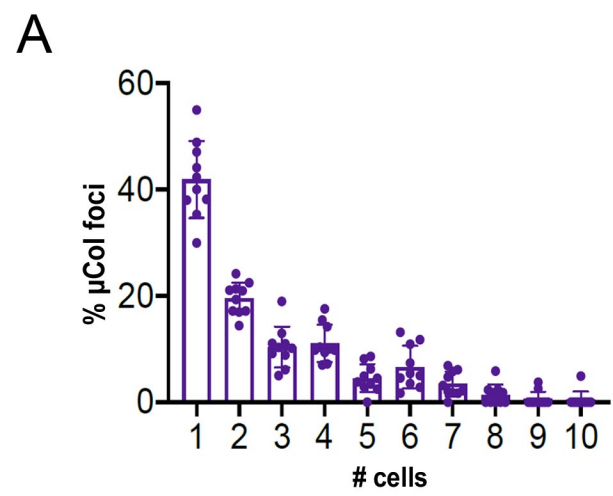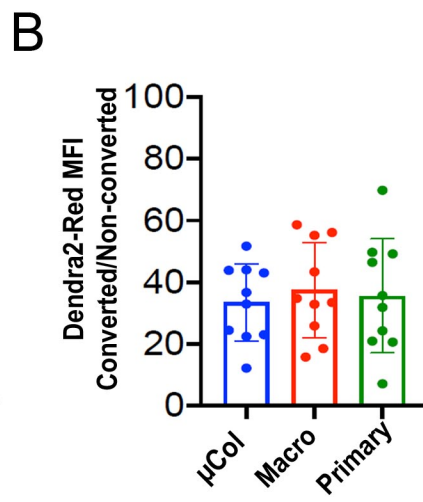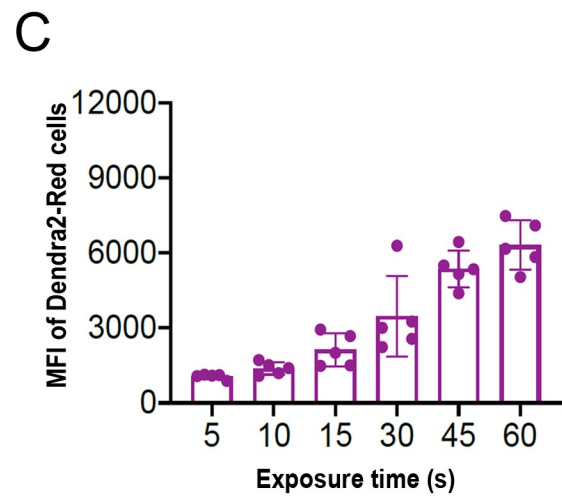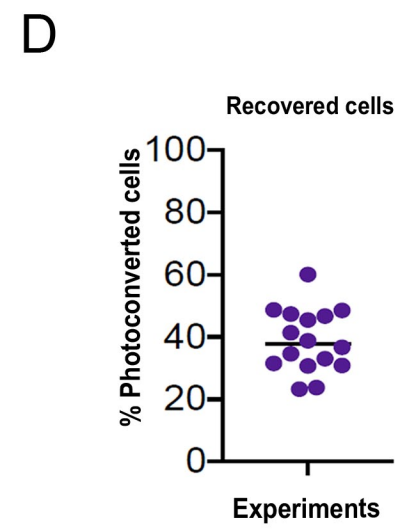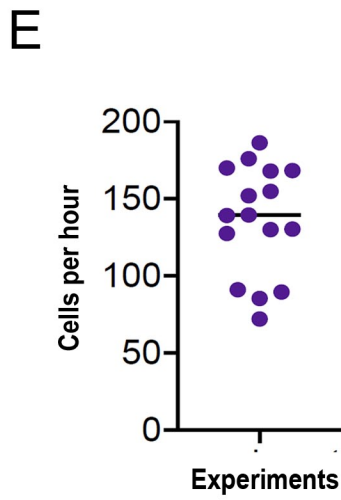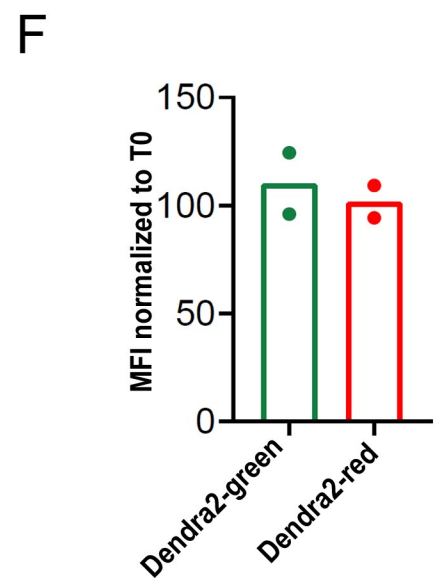

Figure1-figure supplement 2

Supplement: supp [file elife-63270-supp-v1.zip › elife_poa_e63270_Figure_1_figure_supplement_2.pdf]

A

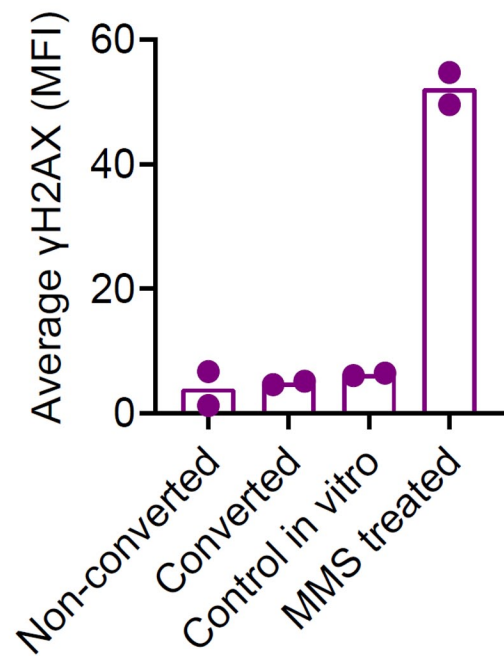

B

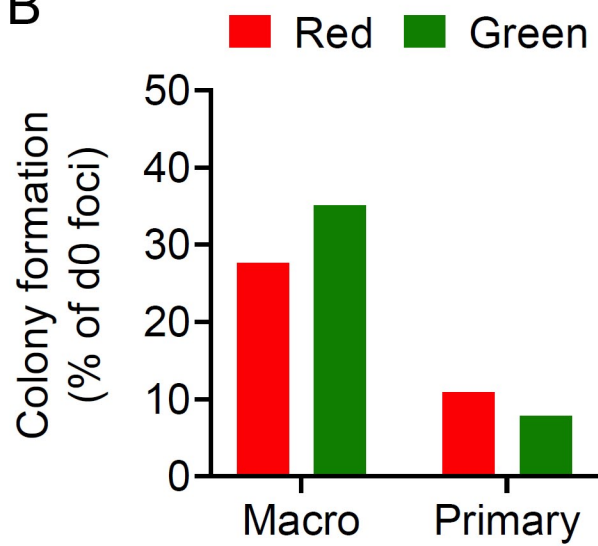

Figure1-figure supplement 3

Supplement: supp [file elife-63270-supp-v1.zip › elife_poa_e63270_Figure_1_figure_supplement_3.pdf]
